# Supplementary material for: Freezing-assisted reverse microemulsion synthesis of hollow mesoporous silica encapsulated glucose oxidase
Source: Royal Society of Chemistry journal article supplement (doi:10.1039/d2nj03324k), 2023-01-01
Supplement: d2nj03324k4.pdf [file d2nj03324k4.pdf]

Supporting Information of

**Freezing-assisted reverse microemulsion synthesis of hollow mesoporous silica encapsulated glucose oxidase**

Jinxu Cao,<sup>a</sup> Feng Shi,<sup>b</sup> Long Chen,<sup>a</sup> Xuemei Xu,<sup>a</sup> Zhen Chen,<sup>c</sup> Zhanjun Yang,<sup>b,\*</sup>

Xingmao Jiang<sup>a,\*</sup>

<sup>a</sup> School of Chemical Engineering & Pharmacy, Wuhan Institute of Technology,  
Wuhan 430205, China

<sup>b</sup> Jiangsu Key Laboratory of Environmental Material and Environmental  
Engineering, School of Chemistry and Chemical Engineering, Yangzhou University,  
Yangzhou 225002, China.

<sup>c</sup> Polyhydro (Shanghai) Advanced Material Science Technology Co., Ltd., Shanghai  
200333, China.

\*Corresponding author, Prof. X. Jiang. E-mail address: [jxm@wit.edu.cn](mailto:jxm@wit.edu.cn)

Prof. Z. Yang. E-mail address: [zjyang@yzu.edu.cn](mailto:zjyang@yzu.edu.cn)

## **1. Materials and Methods**

### *1.1. Element mapping analysis*

TF-G20 high resolution TEM (Thermo Fisher Scientific, USA) was applied to characterize GOx@HMSNs morphology and analyzed the distribution of Si, O and N.

### *1.2. Assay for GOx activity*

The GOx activity was determined according to previous literature. Briefly, pure GOx, GOx@HMSNs fresh sample and its storage with the equivalent GOx content, and HMSNs fresh sample as well as its storage were studied. The storage condition was under 75%RH and room temperature. Then, a known amount of samples were reacted with 100 mM glucose in 0.2 M phosphate buffer (pH7) for 10 min at 26°C. Then, the supernatant of sample was harvested by centrifugation at 12000 rpm for 10 min. Next, a known aliquot of the supernatant was mixed with an assay mixture containing 10 units of horseradish peroxidase, 0.2 mM dye 4-aminoantipyrine, and 2.5 mM phenol. Afterwards, the resultant pink quinoneimine complex in these samples was measured using UV-vis spectrophotometry at 510 nm. Through analyzing the dilution factor and a calibration plot, the relative activity of GOx could be obtained via setting the absolute activity of free GOx as 100%, all other samples were calculated by comparison and obeyed the protocol.

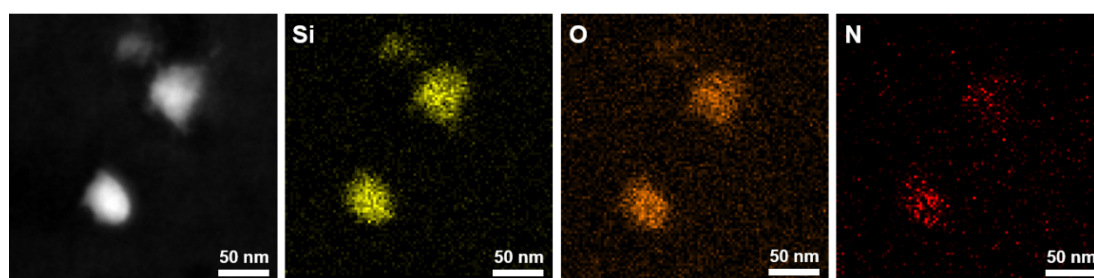

**Fig. S1.** Element mapping for silicon, oxygen, nitrogen of GOx@HMSNs.

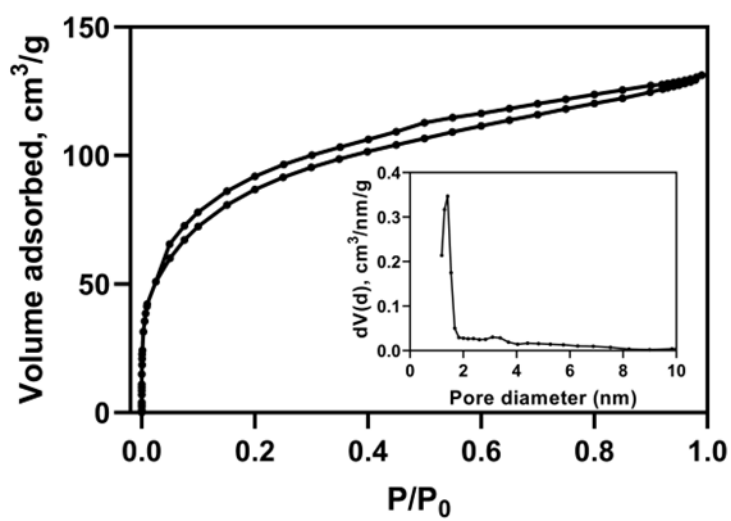

**Fig. S2.** N<sub>2</sub> adsorption-desorption isotherm curves and corresponding pore size distribution curve of GOx@HMSNs.

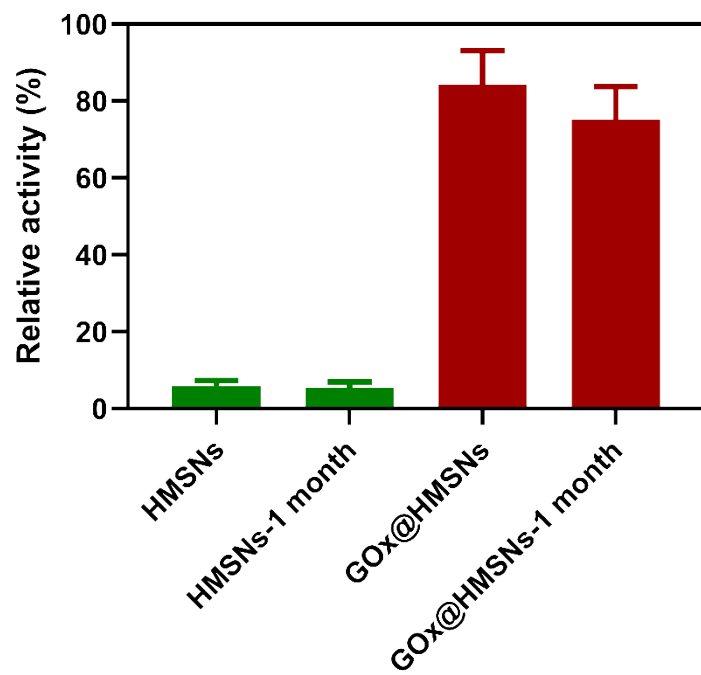

**Fig. S3.** The enzyme activity of GOx@ HMSNs before and after one month storage
