# Supplementary figures and images for: Freezing-assisted reverse microemulsion synthesis of hollow mesoporous silica encapsulated glucose oxidase
Source: Royal Society of Chemistry journal article supplement (doi:10.1039/d2nj03324k), 2023-01-01

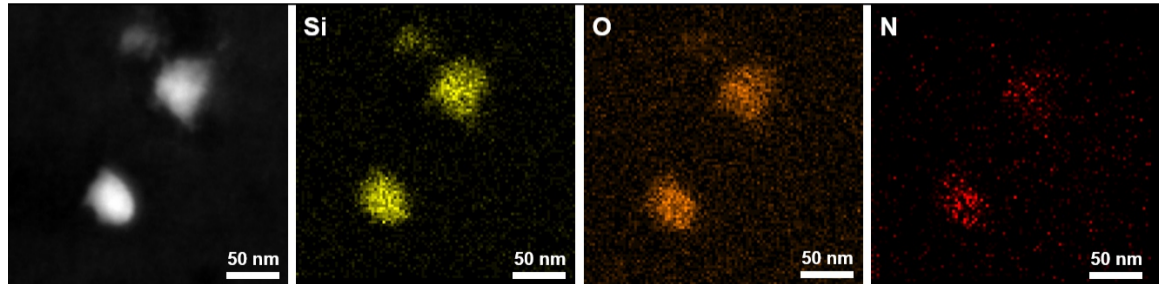

Supplement: d2nj03324k1.pdf [file d2nj03324k1.pdf]

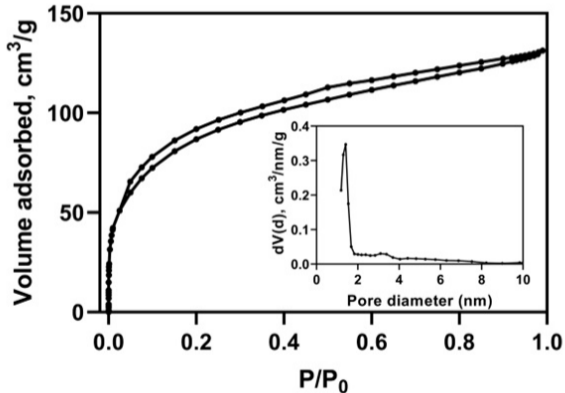

Supplement: d2nj03324k2.pdf [file d2nj03324k2.pdf]

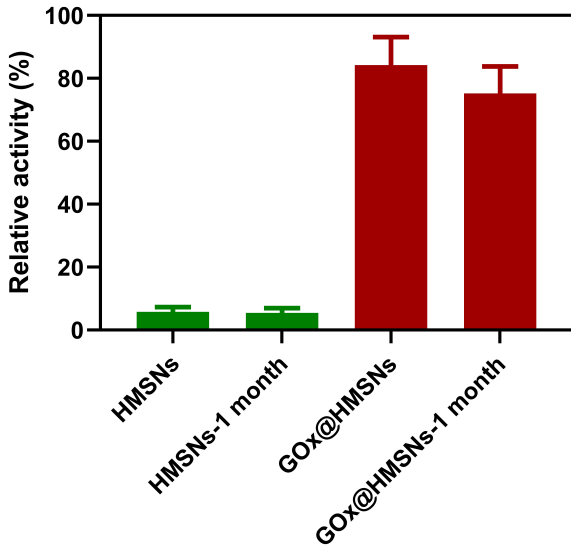

Supplement: d2nj03324k3.pdf [file d2nj03324k3.pdf]
